# Supplementary material for: Analysis of Receptor Tyrosine Kinase ROS1-Positive Tumors in Non–Small Cell Lung Cancer: Identification of a FIG-ROS1 Fusion
Source: Oxford University Press journal article supplement (doi:10.1158/1078-0432.ccr-11-3351), 2012-06-02
Supplement: 10780432ccr113351-sup-tab1.xlsx [file 10780432ccr113351-sup-tab1.xlsx]

## Sheet: Sheet1
Supplemental Table I RT-PCR Results for FFPE ROS1 positive tumors
Tumor ID	SLC34A2-ROS1 (S)	SLC34A2-ROS1 (L)	CD74-ROS1	FIG-ROS1 (S)
570	-	-	+	NT
400037	-	-	+	NT
306	-	-	+	NT
668	-	-	+	NT
702	+	+	-	NT
147	+	+	-	NT
729	NT	NT	NT	+
-	not amplified
+	sequence verified PCR product
NT	not tested
NT, not tested
